# Supplementary material for: A tough, anticorrosive hydrogel consisting of bio-friendly resources for conductive and electromagnetic shielding materials
Source: Royal Society of Chemistry journal article supplement (doi:10.1039/d3nj02339g), 2023-01-01
Supplement: d3nj02339g1.pdf [file d3nj02339g1.pdf]

**Tough, anticorrosive hydrogel consisting of bio-friendly resources for  
conductive and electromagnetic shielding materials**

*Yuhuan Xu<sup>1</sup>, Meng Pei<sup>1</sup>, Jingyu Du<sup>1</sup>, Renyuan Yang<sup>1</sup>, Yong Pan<sup>1</sup>, Daohai*

*Zhang<sup>1,2\*</sup>, Shuhao Qin<sup>1,2\*</sup>*

1. School of Chemical Engineering of Guizhou Minzu University, Guizhou, Guiyang  
550025;

2. National Engineering Research Center for Compounding and Modification of  
Polymer Materials, Guizhou, Guiyang, 550014

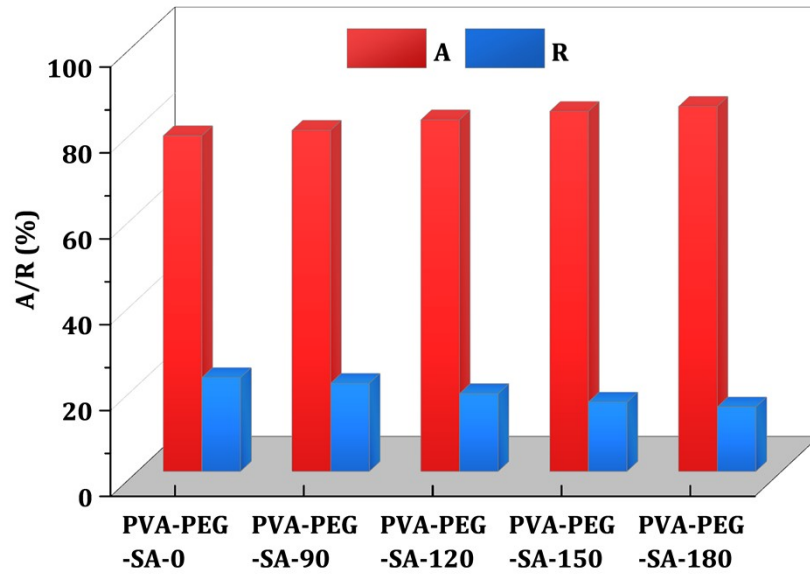

**Fig. S1.** The R-A coefficient of PVA-PEG-SA hydrogels.

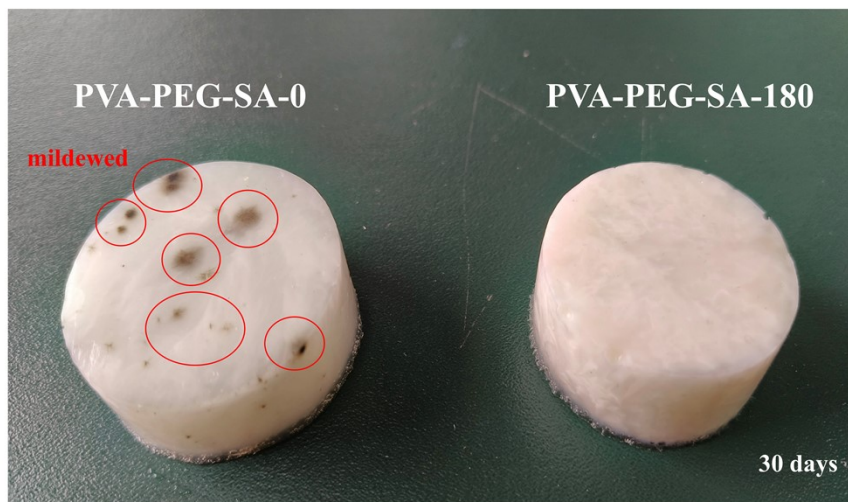

**Fig. S2.** The representative photographs of PVA-PEG-SA-0 hydrogel and PVA-PEG-SA-180 hydrogel store changes 30 days.

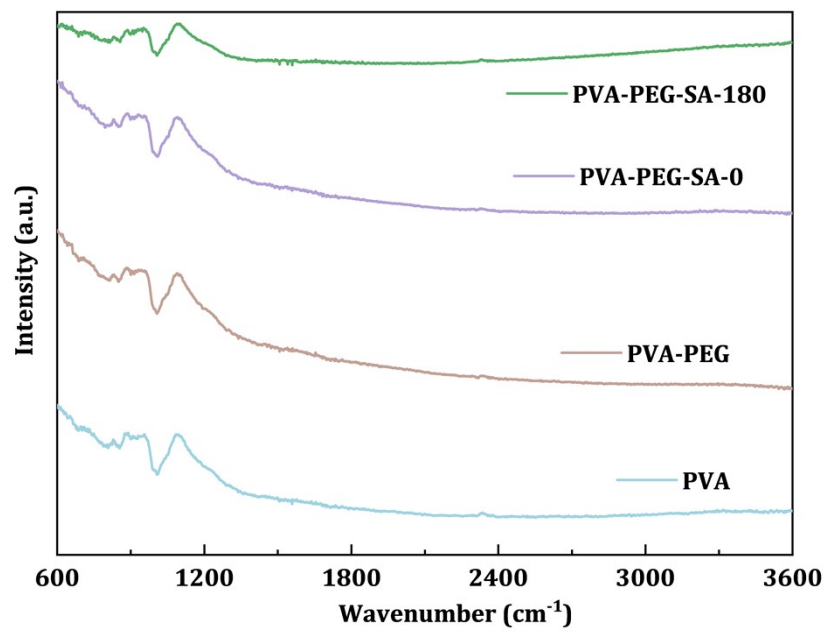

**Fig. S3.** FTIR spectra of different composition of PVA-PEG-SA hydrogels
